# Supplementary material for: Genome‐wide association analysis of hyperspectral reflectance data to dissect the genetic architecture of growth‐related traits in maize under plant growth‐promoting bacteria inoculation
Source: PubMed Central journal article supplement (PMC10123960; doi:10.1002/pld3.492), 2023-04-24
Supplement: PLD3-7-e492-s001.pdf [file PLD3-7-e492-s001.pdf]

Genome-wide association analysis of hyperspectral reflectance data  
to dissect the genetic architecture of growth-related traits in maize  
under plant growth-promoting bacteria inoculation

Rafael Massahiro Yassue<sup>1</sup>, Giovanni Galli<sup>1</sup>, Chunpeng James Chen<sup>2,3</sup>, Roberto  
Fritsche-Neto<sup>1,4,\*</sup>, and Gota Morota<sup>2,3,\*</sup>

<sup>1</sup>Department of Genetics, 'Luiz de Queiroz' College of Agriculture, University of São Paulo,  
São Paulo, Brazil

<sup>2</sup>School of Animal Sciences, Virginia Polytechnic Institute and State University,  
Blacksburg, USA

<sup>3</sup>Center for Advanced Innovation in Agriculture, Virginia Polytechnic Institute and State  
University, Blacksburg, VA 24061 USA

<sup>4</sup>Quantitative Genetics and Biometrics Cluster, International Rice Research Institute, Los  
Baños, Philippines

# Supplementary Tables

Table S1: List of hyperspectral indices used in the study.

| Index                                                                                                          | Abbreviation | Formula                                                                             | Reference                   |
|----------------------------------------------------------------------------------------------------------------|--------------|-------------------------------------------------------------------------------------|-----------------------------|
| Boochs index                                                                                                   | Boochs       | $D_{703}$                                                                           | (Boochs et al., 1990)       |
| Boochs index 2                                                                                                 | Boochs2      | $D_{720}$                                                                           | (Boochs et al., 1990)       |
| Carter index                                                                                                   | Carter       | $R_{695}/R_{420}$                                                                   | (Carter, 1994)              |
| Carter index 2                                                                                                 | Carter2      | $R_{695}/R_{760}$                                                                   | (Carter, 1994)              |
| Carter index 3                                                                                                 | Carter3      | $R_{605}/R_{760}$                                                                   | (Carter, 1994)              |
| Carter index 4                                                                                                 | Carter4      | $R_{710}/R_{760}$                                                                   | (Carter, 1994)              |
| Carter index 5                                                                                                 | Carter5      | $R_{695}/R_{670}$                                                                   | (Carter, 1994)              |
| Carter index 5                                                                                                 | Carter6      | $R_{550}$                                                                           | (Carter, 1994)              |
| Chlorophyll index                                                                                              | CI           | $R_{675} * R_{690}/R_{683}^2$                                                       | (Zarco-Tejada et al., 2013) |
| Chlorophyll index 2                                                                                            | CI2          | $R_{760}/R_{700} - 1$                                                               | (Gitelson et al., 2003)     |
| Chlorophyll absorption integral                                                                                | ClAInt       | $\int_{60nm}^{735nm} R$                                                             | (Oppelt and Mauser, 2004)   |
| Carotenoid reflectance index 1                                                                                 | CRI1         | $1/R_{515} - 1/R_{550}$                                                             | (Gitelson et al., 2003)     |
| Carotenoid reflectance index 2                                                                                 | CRI2         | $1/R_{515} - 1/R_{770}$                                                             | (Gitelson et al., 2003)     |
| Carotenoid reflectance index 3                                                                                 | CRI3         | $1/R_{515} - 1/R_{550} * R_{770}$                                                   | (Gitelson et al., 2003)     |
| Carotenoid reflectance index 4                                                                                 | CRI4         | $1/R_{515} - 1/R_{700} * R_{770}$                                                   | (Gitelson et al., 2003)     |
| Simple Ratio 730/706                                                                                           | D1           | $D_{730}/D_{706}$                                                                   | (Zarco-Tejada et al., 2013) |
| Simple Ratio 705/722                                                                                           | D2           | $D_{705}/D_{722}$                                                                   | (Zarco-Tejada et al., 2013) |
| Datt index                                                                                                     | Datt         | $(R_{850} - R_{710})/(R_{850} - R_{680})$                                           | (Datt, 1999)                |
| Datt index2                                                                                                    | Datt2        | $R_{850}/R_{710}$                                                                   | (Datt, 1999)                |
| Datt index 3                                                                                                   | Datt3        | $D_{754}/D_{704}$                                                                   | (Datt, 1999)                |
| Datt index 4                                                                                                   | Datt4        | $R_{672}/(R_{550} * R_{708})$                                                       | (Datt, 1999)                |
| Datt index 5                                                                                                   | Datt5        | $R_{672}/R_{550}$                                                                   | (Datt, 1999)                |
| Datt index 6                                                                                                   | Datt6        | $(R_{860})/(R_{550} * R_{708})$                                                     | (Datt, 1999)                |
| Double difference index                                                                                        | DD           | $(R_{749} - R_{720}) - (R_{701} - R_{672})$                                         | (le Maire et al., 2004)     |
| New double difference index                                                                                    | DDn          | $2 * (R_{710} - R_{660} - R_{760})$                                                 | (le Maire et al., 2008)     |
| Double peak index                                                                                              | DPI          | $(D_{688} * D_{710})/D_{697}^2$                                                     | (Zarco-Tejada et al., 2013) |
| Disease water stress index                                                                                     | DWSI4        | $R_{550}/R_{680}$                                                                   | (Apan et al., 2004)         |
| Normalized ratio between the maxima of the first derivatives of reflectances at the red edge and green regions | EGFN         | $(\max(D_{650:750}) - \max(D_{500:550})) / (\max(D_{650:750}) + \max(D_{500:550}))$ | (Peñuelas et al., 1994)     |
| Ratio between dRE and dG                                                                                       | EGFR         | $\max(D_{650:750}) / \max(D_{500:550})$                                             | (Peñuelas et al., 1994)     |
| Enhanced vegetation index                                                                                      | EVI          | $25 * ((R_{800} - R_{670}) / (R_{800} - (6 * R_{670}) - (75 * R_{475}) + 1))$       | (Huete et al., 1997)        |
| Generalized difference vegetation index                                                                        | GDVI.2       | $(R_{800}^n - R_{680}^n) / (R_{800}^n + R_{680}^n)$                                 | (Wu, 2014)                  |
| Generalized difference vegetation index                                                                        | GDVI.3       |                                                                                     | (Wu, 2014)                  |
| Generalized difference vegetation index                                                                        | GDVI.4       |                                                                                     | (Wu, 2014)                  |
| Greenness index                                                                                                | GI           | $R_{554}/R_{677}$                                                                   | (Smith et al., 1995)        |
| Gitelson index                                                                                                 | Gitelson     | $1/R_{700}$                                                                         | (Gitelson et al., 1999)     |
| Gitelson index 2                                                                                               | Gitelson2    | $(R_{750} - R_{800}/R_{695} - R_{740}) - 1$                                         | (Gitelson et al., 2003)     |

Rxxx: Reflectance at wavelength 'xxx'.

Dxxx: First derivation of reflectance values at wavelength 'xxx'.

maxxxx: maximum value at wavelength 'xxx'.

Table S1: (Continued). List of hyperspectral indices used in the study.

| Index                                                  | Abbreviation            | Formula                                                                          | Reference                                         |
|--------------------------------------------------------|-------------------------|----------------------------------------------------------------------------------|---------------------------------------------------|
| Maccioni index                                         | Maccioni                | $(R_{780} - R_{710}) / (R_{780} - R_{680})$                                      | (Maccioni et al., 2001)                           |
| Modified chlorophyll absorption in reflectance index   | MCARI                   | $((R_{700} - R_{670}) - 0.2 * (R_{700} - R_{550})) * (R_{700} / R_{670})$        | (Daughtry et al., 2000)                           |
| Modified chlorophyll absorption in reflectance index 2 | MCARI/OSAVI<br>MCARI2   | $((R_{750} - R_{705}) - 0.2 * (R_{750} - R_{550})) * (R_{750} / R_{705})$        | (Daughtry et al., 2000)<br>(Wu et al., 2008)      |
| Modified normalized difference at 705 nm wavelength    | MCARI2/OSAVI2<br>mND705 | $(R_{750} - R_{705}) / (R_{750} + R_{705} - 2 * R_{445})$                        | (Wu et al., 2008)<br>(Sims and Gamon, 2002)       |
| Modified normalized difference vegetation index        | mNDVI                   | $(R_{800} - R_{680}) / (R_{800} + R_{680} - 2 * R_{445})$                        | (Sims and Gamon, 2002)                            |
| Normalized difference physiological reflectance index  | MPRI                    | $(R_{515} - R_{530}) / (R_{515} + R_{530})$                                      | (Hernández-Clemente et al., 2011)                 |
| Modified red-edge inflection point                     | mREIP                   | red-edge inflection point using Gaussain fit                                     | (MILLER et al., 1990)                             |
| Modified soil-adjusted vegetation index                | MSAVI                   | $05 * (2 * R_{800} + 1 - ((2 * R_{800} + 1)^2 - 8 * (R_{800} - R_{670}))^{0.5})$ | (Qi et al., 1994)                                 |
| Modified simple ratio of reflectance                   | mSR                     | $(R_{800} - R_{445}) / (R_{680} - R_{445})$                                      | (Sims and Gamon, 2002)                            |
| Modified simple ratio of reflectance 2                 | mSR2                    | $(R_{750} / R_{705}) - 1 / (R_{750} / R_{705} + 1)^{0.5}$                        | (Chen, 1996)                                      |
| Modified simple ratio of reflectance 705               | mSR705                  | $(R_{750} - R_{445}) / (R_{705} - R_{445})$                                      | (Sims and Gamon, 2002)                            |
| MERIS terrestrial chlorophyll index                    | MTCI                    | $(R_{754} - R_{709}) / (R_{709} - R_{681})$                                      | (Dash and Curran, 2004)                           |
| Modified triangular vegetation index                   | MTVI                    | $1.2 * (1.2 * (R_{800} - R_{550}) - 25 * (R_{670} - R_{550}))$                   | (Haboudane et al., 2002)                          |
| Chlorophyll absorption ratio index                     | Cari                    |                                                                                  | (Kim et al., 1994)                                |
| Normalized difference vegetation index                 | NDVI                    | $(R_{800} - R_{680}) / (R_{800} + R_{680})$                                      | (Tucker, 1979)                                    |
| Normalized difference vegetation index 2               | NDVI2                   | $(R_{750} - R_{705}) / (R_{750} + R_{705})$                                      | (Gitelson and Merzlyak, 1994)                     |
| Normalized difference vegetation index 3               | NDVI3                   | $(R_{682} - R_{553}) / (R_{682} + R_{553})$                                      | (Gandia et al., 2004)                             |
| Normalized pigment chlorophyll index                   | NPCI                    | $(R_{680} - R_{430}) / (R_{680} + R_{430})$                                      | (Peñuelas et al., 1994)                           |
| Optimized soil-adjusted vegetation index               | OSAVI                   | $(1 + 0.16) * (R_{800} - R_{670}) / (R_{800} + R_{670} + 0.16)$                  | (Rondeaux et al., 1996)                           |
| Optimized soil-adjusted vegetation index 2             | OSAVI2                  | $(1 + 0.16) * (R_{750} - R_{705}) / (R_{750} + R_{705} + 0.16)$                  | (Wu et al., 2008)                                 |
| Ratio analysis of reflectance spectra                  | PARS                    | $R_{746} / R_{513}$                                                              | (Chappelle et al., 1992)                          |
| Photochemical reflectance index                        | PRI                     | $(R_{531} - R_{570}) / (R_{531} + R_{570})$                                      | (Gamon et al., 1992)                              |
| Photochemical reflectance index normalized             | PRLnorm                 | $PRI * (-1) / (RDVI * R_{700} / R_{670})$                                        | (Zarco-Tejada et al., 2013)                       |
| Plant senescence reflectance index                     | PRI * CI2<br>PSRI       | $PRI * CI2$<br>$(R_{678} - R_{500}) / R_{750}$                                   | (Garrity et al., 2011)<br>(Merzlyak et al., 1999) |

Rxxx: Reflectance at wavelength 'xxx'.

Dxxx: First derivation of reflectance values at wavelength 'xxx'.

maxxxx: maximum value at wavelength 'xxx'.

Table S1: (Continued). List of hyperspectral indices used in the study.

| Index                                                  | Abbreviation | Formula                                                                      | Reference                                      |
|--------------------------------------------------------|--------------|------------------------------------------------------------------------------|------------------------------------------------|
| Red-edge position linear interpolation                 | REP_LE       | Red-edge position through linear extrapolation                               | (Cho and Skidmore, 2006)                       |
| Red-edge position linear interpolation                 | REP_Li       | $R_{re} = (R_{670} + R_{780})/2$                                             | (Guyot and Baret, 1988)                        |
| Soil adjusted vegetation index                         | SAVI         | $(1 + L) * (R_{800} - R_{670}) / (R_{800} + R_{670} + L)$                    | (Huete, 1988)                                  |
| Structure insensitive pigment index                    | SIPI         | $(R_{800} - R_{445}) / (R_{800} - R_{680})$                                  | (Peñuelas et al., 1995; PENUELAS et al., 1995) |
| spectral polygon vegetation index                      | SPVI         | $0.4 * 3.7 * (R_{800} - R_{670}) - 1.2 * ((R_{530} - R_{670})^2)^{0.5}$      | (Vincini et al., 2006)                         |
| Simple ratio                                           | SR           | $R_{800} / R_{680}$                                                          | (Jordan, 1969)                                 |
| Simple ratio 1                                         | SR1          | $R_{750} / R_{700}$                                                          | (Gitelson and Merzlyak, 1997)                  |
| Simple ratio 2                                         | SR2          | $R_{752} / R_{690}$                                                          | (Gitelson and Merzlyak, 1997)                  |
| Simple ratio 3                                         | SR3          | $R_{750} / R_{550}$                                                          | (Gitelson and Merzlyak, 1997)                  |
| Simple ratio 4                                         | SR4          | $R_{700} / R_{670}$                                                          | (McMurtrey et al., 1994)                       |
| Simple ratio 5                                         | SR5          | $R_{675} / R_{700}$                                                          | (Chappelle et al., 1992)                       |
| Simple ratio 6                                         | SR6          | $R_{750} / R_{710}$                                                          | (Zarco-Tejada and Miller, 1999)                |
| Simple ratio 7                                         | SR7          | $R_{440} / R_{690}$                                                          | (Lichtenthaler et al., 1996)                   |
| Simple ratio 8                                         | SR8          | $R_{515} / R_{550}$                                                          | (Hernández-Clemente et al., 2012)              |
| Simple ratio pigment index                             | SRPI         | $R_{430} / R_{680}$                                                          | (PENUELAS et al., 1995)                        |
| Sum of first derivative reflectance 1                  | Sum_Dr1      | $\Sigma_{i=626}^{795} D1_i$                                                  | (Elvidge and Chen, 1995)                       |
| Sum of first derivative reflectance 2                  | Sum_Dr2      | $\Sigma_{i=680}^{780} D1_i$                                                  | (Filella and Peñuelas, 1994)                   |
| Transformed chlorophyll absorption reflectance index   | TCARI        | $3 * ((R_{700} - R_{670}) - 02 * R_{700} - R_{550}) * (R_{700} / R_{670})$   | (Haboudane et al., 2002)                       |
| Transformed chlorophyll absorption reflectance index 2 | TCARI/OSAVI  | $TCARI / OSAVI$                                                              | (Haboudane et al., 2002)                       |
| Triangular greenness index                             | TCARI2       | $3 * ((R_{750} - R_{705}) - 02 * (R_{750} - R_{550}) * (R_{750} / R_{705}))$ | (Wu et al., 2008)                              |
| Triangular greenness index                             | TGI          | $-0.5(190(R_{670} - R_{550}) - 1.20(R_{670} - R_{480}))$                     | (Hunt et al., 2013)                            |
| Triangular vegetation index                            | TVI          | $0.5 * (120 * (R_{750} - R_{550}) - 200 * (R_{670} - R_{550}))$              | (Broge and Leblanc, 2001)                      |
| Vogelmann index                                        | Vogelmann    | $R_{740} / R_{720}$                                                          | Vogelmann et al. (1993)                        |
| Vogelmann index 2                                      | Vogelmann2   | $(R_{734} - R_{747}) / (R_{715} + R_{726})$                                  | Vogelmann et al. (1993)                        |
| Vogelmann index 3                                      | Vogelmann3   | $D_{715} / D_{705}$                                                          | Vogelmann et al. (1993)                        |
| Vogelmann index 4                                      | Vogelmann4   | $(R_{734} - R_{747}) / (R_{715} + R_{720})$                                  | Vogelmann et al. (1993)                        |
| Ratio vegetation index                                 | RVI          | $R_{790} / R_{650}$                                                          | (Pearson and Miller, 1972)                     |

Rxxx: Reflectance at wavelength 'xxx'.

Dxxx: First derivation of reflectance values at wavelength 'xxx'.

maxxxx: maximum value at wavelength 'xxx'.

Table S1: (Continued). List of hyperspectral indices used in the study.

| Index                                                     | Abbreviation | Formula                                                                | Reference                             |
|-----------------------------------------------------------|--------------|------------------------------------------------------------------------|---------------------------------------|
| Red-edge position linear interpolation                    | REP          | $R_{700} + 40 * ((R_{670} + R_{780})/2 - R_{700})/(R_{740} - R_{700})$ | (Ali and Imran, 2020)                 |
| First derivative                                          | FD730        | $D_{730}$                                                              | (Peng et al., 2018)                   |
| Modified Datt index                                       | MDATT        | $(R_{719} - R_{726})/(R_{719} - R_{743})$                              | (Velichkova and Krezhova, 2019)       |
| Modified red-edge simple ratio                            | MRESR        | $(R_{750} - R_{450})/(R_{705} + R_{450})$                              | (Velichkova and Krezhova, 2019)       |
| Near infrared/Red 1                                       | NR1          | $R_{760}/R_{695}$                                                      | (Velichkova and Krezhova, 2019)       |
| Near infrared/Red 2                                       | NR2          | $R_{800}/R_{650}$                                                      | (Velichkova and Krezhova, 2019)       |
| Zarco - Miller Index                                      | ZM           | $R_{750}/R_{710}$                                                      | (Velichkova and Krezhova, 2019)       |
| Greenness                                                 | G            | $R_{554}/R_{667}$                                                      | (Velichkova and Krezhova, 2019)       |
| Blue/Green                                                | BG           | $R_{677}/R_{554}$                                                      | (Velichkova and Krezhova, 2019)       |
| Vogelmann red edge                                        | VREI1        | $R_{740}/R_{720}$                                                      | (Velichkova and Krezhova, 2019)       |
| Single band index                                         | SB           | $1/R_{700}$                                                            | (Velichkova and Krezhova, 2019)       |
| Single-difference index                                   | SD           | $(1/R_{550}) - (1/R_{750})$                                            | (Velichkova and Krezhova, 2019)       |
| Green Chl index                                           | Chlg         | $R_{760}/R_{550} - 1$                                                  | (Velichkova and Krezhova, 2019)       |
| Red edge Chl index                                        | Chlr         | $R_{760}/R_{714} - 1$                                                  | (Velichkova and Krezhova, 2019)       |
| Simple ratio pigment specific simple ratio (Cholophyll a) | PSSRa        | $R_{800}/R_{675}$                                                      | (Blackburn, 1998a)                    |
| Simple ratio pigment specific simple ratio B1             | PSSRb        | $R_{800}/R_{650}$                                                      | (Blackburn, 1998a)                    |
| Normalized pheophytinization index                        | NPQI         | $(R_{415} - R_{435})/(R_{415} + R_{435})$                              | (PEN <sup>-</sup> UELAS et al., 1995) |
| Normalized difference nitrogenindex                       | NDNI         | $(R_{415} - R_{435})/(R_{415} + R_{435})$                              | (Wang and Wei, 2016)                  |
| Lichtenthaler index                                       | MLO          | $R_{531}/R_{645}$                                                      | (Meiforth et al., 2020)               |
| Lichtenthaler index 1                                     | LIC          | $(R_{850} - R_{710})/(R_{850} + R_{680})$                              | (Lichtenthaler et al., 1996)          |
| Lichtenthaler index 2                                     | LIC1         | $(R_{800} - R_{680})/(R_{800} + R_{680})$                              | (Lichtenthaler et al., 1996)          |
| Blue/Green pigment index                                  | LIC2         | $R_{440}/R_{690}$                                                      | (Lichtenthaler et al., 1996)          |
| Blue/Red pigment index                                    | BGI          | $R_{450}/R_{550}$                                                      | (ZARCOTEJADA et al., 2005)            |
| Ratio analysis of reflectance spectra chlorophyll a       | BRI          | $(R_{450}/R_{690})$                                                    | (ZARCOTEJADA et al., 2005)            |
| Ratio analysis of reflectance spectra chlorophyll b       | RARSa        | $(R_{675}/R_{700})$                                                    | (Kycko et al., 2019)                  |
|                                                           | RARSb        | $(R_{675}/(R_{650} * R_{700}))$                                        | (Montesinos-López et al., 2017)       |

Rxxx: Reflectance at wavelength 'xxx'.

Dxxx: First derivation of reflectance values at wavelength 'xxx'.

maxxxx: maximum value at wavelength 'xxx'.

Table S1: (Continued). List of hyperspectral indices used in the study.

| Index                                                              | Abbreviation | Formula                                                                             | Reference                       |
|--------------------------------------------------------------------|--------------|-------------------------------------------------------------------------------------|---------------------------------|
| Gitelson and Merzylak index 1                                      | GMI1         | $R_{750}/R_{550}$                                                                   | (Gitelson et al., 2003)         |
| Gitelson and Merzylak index2                                       | GMI2         | $R_{750}/R_{700}$                                                                   | (Gitelson et al., 2003)         |
| Green normalized difference vegetation indexx                      | GreenNDVI    | $(R_{800} - R_{550})/(R_{800} + R_{550})$                                           | (Gitelson et al., 1996)         |
| Simple ratio 800/635 pigment specific simple ratio (Chlorophyll b) | PSSR         | $R_{800}/R_{635}$                                                                   | (Blackburn, 1998b)              |
| Pigment specific normalised difference                             | PSND         | $(R_{800} - R_{470})/(R_{800} + R_{470})$                                           | (Blackburn, 1998b)              |
| Plant water index                                                  | PWI          | $R_{900}/R_{970}$                                                                   | (Peñuelas et al., 1994)         |
| Renormalized difference vegetation index                           | RDVI         | $(R_{800} - R_{670})/\sqrt{R_{800} + R_{670}}$                                      | (Roujean and Breon, 1995)       |
| Zhen Index                                                         | Zen          | $(R_{785} - R_{810})/((R_{785} + R_{810}) - (2 * R_{802}))$                         | (Zhen et al., 2020)             |
| Difference vegetation index                                        | DVI          | $R_{782}/R_{675}$                                                                   | (Peng et al., 2018)             |
| Transformed soil adjusted vegetation index                         | TSAVI        | $0.5 * (R_{782} - (0.5 * R_{675}) - 0.2)/((0.5 * R_{782}) + (0.5 * R_{675}) - 0.1)$ | (Baret et al., 1989)            |
| Perpendicular vegetation index                                     | PVI          | $(R_{800} - (0.2 * R_{670}) - 06)/1.019$                                            | (Darvishzadeh et al., 2006)     |
| Ratio analysis of reflectance spectra chlorophyll c                | RARSc        | $(R_{760}/R_{500})$                                                                 | (Montesinos-López et al., 2017) |
| Green normalized difference vegetation index                       | GNDVI        | $(R_{780} - R_{670})/(R_{780} + R_{670})$                                           | (Montesinos-López et al., 2017) |
| Red normalized difference vegetation index                         | RNDVI        | $(R_{780} - R_{550})/(R_{780} + R_{550})$                                           | (Montesinos-López et al., 2017) |

Rxxx: Reflectance at wavelength 'xxx'.

Dxxx: First derivation of reflectance values at wavelength 'xxx'.

maxxxx: maximum value at wavelength 'xxx'.

Table S2: Selected single nucleotide polymorphisms based on BayesC using the posterior inclusion probability threshold of 0.10 for plant height (PH) under the B- management.

| Management | Trait | Chromosome | Marker ID       | Minor allele frequency | Posterior inclusion probability |
|------------|-------|------------|-----------------|------------------------|---------------------------------|
| B-         | PH    | 1          | Chr1_6916155    | 0.38                   | 0.814                           |
| B-         | PH    | 1          | Chr1_115455586  | 0.12                   | 0.264                           |
| B-         | PH    | 2          | Chr2_14984692   | 0.44                   | 0.277                           |
| B-         | PH    | 2          | Chr2_43718939   | 0.12                   | 0.162                           |
| B-         | PH    | 2          | Chr2_108275267  | 0.47                   | 0.112                           |
| B-         | PH    | 2          | Chr2_112068617  | 0.49                   | 0.128                           |
| B-         | PH    | 2          | Chr2_112233172  | 0.49                   | 0.291                           |
| B-         | PH    | 3          | Chr3_57358057   | 0.31                   | 0.733                           |
| B-         | PH    | 4          | Chr4_162995251  | 0.29                   | 0.387                           |
| B-         | PH    | 4          | Chr4_174621437  | 0.33                   | 0.215                           |
| B-         | PH    | 4          | Chr4_214178316  | 0.36                   | 0.133                           |
| B-         | PH    | 4          | Chr4_238615869  | 0.26                   | 0.677                           |
| B-         | PH    | 5          | Chr5_4105099    | 0.32                   | 0.143                           |
| B-         | PH    | 5          | Chr5_17293217   | 0.28                   | 0.137                           |
| B-         | PH    | 6          | Chr6_93020758   | 0.08                   | 0.122                           |
| B-         | PH    | 6          | Chr6_168918815  | 0.33                   | 0.190                           |
| B-         | PH    | 7          | Chr7_161417373  | 0.30                   | 0.187                           |
| B-         | PH    | 8          | Chr8_67750993   | 0.12                   | 0.172                           |
| B-         | PH    | 9          | Chr9_28676437   | 0.23                   | 0.217                           |
| B-         | PH    | 9          | Chr9_28678507   | 0.22                   | 0.211                           |
| B-         | PH    | 9          | Chr9_32797796   | 0.49                   | 0.146                           |
| B-         | PH    | 9          | Chr9_32797855   | 0.48                   | 0.210                           |
| B-         | PH    | 9          | Chr9_150486056  | 0.30                   | 0.176                           |
| B-         | PH    | 10         | Chr10_133638870 | 0.40                   | 0.139                           |

Table S3: Selected single nucleotide polymorphisms based on BayesC using the posterior inclusion probability threshold of 0.10 for stalk diameter (SD) under the B- management.

| Management | Trait | Chromosome | Marker ID      | Minor allele frequency | Posterior inclusion probability |
|------------|-------|------------|----------------|------------------------|---------------------------------|
| B-         | SD    | 1          | Chr1_203994793 | 0.49                   | 0.109                           |
| B-         | SD    | 2          | Chr2_10595188  | 0.45                   | 0.102                           |
| B-         | SD    | 2          | Chr2_189507598 | 0.40                   | 0.156                           |
| B-         | SD    | 2          | Chr2_220144531 | 0.42                   | 0.144                           |
| B-         | SD    | 3          | Chr3_133566445 | 0.21                   | 0.108                           |
| B-         | SD    | 3          | Chr3_157011824 | 0.34                   | 0.133                           |
| B-         | SD    | 5          | Chr5_53086536  | 0.41                   | 0.109                           |
| B-         | SD    | 7          | Chr7_5874773   | 0.13                   | 0.103                           |
| B-         | SD    | 9          | Chr9_45942495  | 0.37                   | 0.203                           |



Table S4: Selected single nucleotide polymorphisms based on BayesC using the posterior inclusion probability threshold of 0.10 for plant height (PH) under the B+ management.

| Management | Trait | Chromosome | Marker ID       | Minor allele frequency | Posterior inclusion probability |
|------------|-------|------------|-----------------|------------------------|---------------------------------|
| B+         | PH    | 1          | Chr1_6540758    | 0.37                   | 0.114                           |
| B+         | PH    | 1          | Chr1_200165533  | 0.37                   | 0.210                           |
| B+         | PH    | 1          | Chr1_255269329  | 0.36                   | 0.206                           |
| B+         | PH    | 2          | Chr2_129846748  | 0.40                   | 0.265                           |
| B+         | PH    | 2          | Chr2_169473601  | 0.49                   | 0.397                           |
| B+         | PH    | 3          | Chr3_158981956  | 0.22                   | 0.109                           |
| B+         | PH    | 4          | Chr4_162995251  | 0.29                   | 0.101                           |
| B+         | PH    | 4          | Chr4_176216697  | 0.15                   | 0.114                           |
| B+         | PH    | 4          | Chr4_203497008  | 0.19                   | 0.156                           |
| B+         | PH    | 5          | Chr5_3760644    | 0.45                   | 0.412                           |
| B+         | PH    | 5          | Chr5_3760660    | 0.39                   | 0.115                           |
| B+         | PH    | 5          | Chr5_75194167   | 0.18                   | 0.137                           |
| B+         | PH    | 5          | Chr5_195847141  | 0.48                   | 0.283                           |
| B+         | PH    | 6          | Chr6_108027757  | 0.49                   | 0.121                           |
| B+         | PH    | 6          | Chr6_150545871  | 0.47                   | 0.387                           |
| B+         | PH    | 6          | Chr6_168918815  | 0.33                   | 0.239                           |
| B+         | PH    | 7          | Chr7_99946782   | 0.15                   | 0.209                           |
| B+         | PH    | 8          | Chr8_155019631  | 0.23                   | 0.228                           |
| B+         | PH    | 10         | Chr10_144153912 | 0.25                   | 0.230                           |
| B+         | PH    | 10         | Chr10_145449487 | 0.20                   | 0.144                           |
| B+         | PH    | 10         | Chr10_145449559 | 0.21                   | 0.128                           |

Table S5: Selected single nucleotide polymorphisms based on BayesC using the posterior inclusion probability of 0.10 for stalk diameter (SD) under the B+ management.

| Management | Trait | Chromosome | Marker ID      | Minor allele frequency | Posterior inclusion probability |
|------------|-------|------------|----------------|------------------------|---------------------------------|
| B+         | SD    | 1          | Chr1_17324463  | 0.31                   | 0.118                           |
| B+         | SD    | 1          | Chr1_49402080  | 0.27                   | 0.120                           |
| B+         | SD    | 1          | Chr1_203994793 | 0.49                   | 0.196                           |
| B+         | SD    | 1          | Chr1_286728045 | 0.47                   | 0.149                           |
| B+         | SD    | 2          | Chr2_16421052  | 0.34                   | 0.166                           |
| B+         | SD    | 2          | Chr2_32734863  | 0.26                   | 0.143                           |
| B+         | SD    | 2          | Chr2_32734876  | 0.25                   | 0.190                           |
| B+         | SD    | 2          | Chr2_38816460  | 0.26                   | 0.306                           |
| B+         | SD    | 2          | Chr2_82458517  | 0.45                   | 0.303                           |
| B+         | SD    | 2          | Chr2_169026437 | 0.36                   | 0.447                           |
| B+         | SD    | 2          | Chr2_219293526 | 0.36                   | 0.241                           |
| B+         | SD    | 3          | Chr3_205139465 | 0.29                   | 0.113                           |
| B+         | SD    | 4          | Chr4_72636153  | 0.30                   | 0.657                           |
| B+         | SD    | 4          | Chr4_164089694 | 0.10                   | 0.119                           |
| B+         | SD    | 4          | Chr4_169305835 | 0.19                   | 0.115                           |
| B+         | SD    | 4          | Chr4_193981325 | 0.29                   | 0.112                           |
| B+         | SD    | 4          | Chr4_244379137 | 0.45                   | 0.120                           |
| B+         | SD    | 6          | Chr6_2916367   | 0.16                   | 0.114                           |
| B+         | SD    | 6          | Chr6_99963274  | 0.23                   | 0.100                           |
| B+         | SD    | 6          | Chr6_103106825 | 0.12                   | 0.118                           |
| B+         | SD    | 7          | Chr7_41779617  | 0.26                   | 0.193                           |
| B+         | SD    | 7          | Chr7_41779668  | 0.37                   | 0.563                           |
| B+         | SD    | 7          | Chr7_161417373 | 0.30                   | 0.140                           |
| B+         | SD    | 8          | Chr8_151688268 | 0.29                   | 0.102                           |
| B+         | SD    | 8          | Chr8_167863049 | 0.44                   | 0.122                           |
| B+         | SD    | 9          | Chr9_18547071  | 0.20                   | 0.115                           |
| B+         | SD    | 10         | Chr10_95462636 | 0.33                   | 0.162                           |

Table S6: Selected single nucleotide polymorphisms based on BayesC using the posterior inclusion probability threshold of 0.10 for shoot dry mass (SDM) under the B+ management.

| Management | Trait | Chromosome | Marker ID       | Minor allele frequency | Posterior inclusion probability |
|------------|-------|------------|-----------------|------------------------|---------------------------------|
| B+         | SDM   | 1          | Chr1_26874225   | 0.27                   | 0.120                           |
| B+         | SDM   | 1          | Chr1_26874654   | 0.41                   | 0.103                           |
| B+         | SDM   | 2          | Chr2_34931185   | 0.47                   | 0.102                           |
| B+         | SDM   | 4          | Chr4_181569268  | 0.33                   | 0.176                           |
| B+         | SDM   | 10         | Chr10_129809018 | 0.37                   | 0.110                           |

Table S7: Common single nucleotide polymorphism identified in the current study and Yassue et al. (2021).  
 PH: plant height, SD: stalk diameter, SDM: shoot dry mass

| Management | Trait | Chromosome | Marker ID      | Minor allele frequency | Posterior inclusion probability |
|------------|-------|------------|----------------|------------------------|---------------------------------|
| B+         | SDM   | 4          | Chr4_181569268 | 0.33                   | 0.176                           |
| B+         | SD    | 2          | Chr2_38816460  | 0.26                   | 0.306                           |
| B+         | SD    | 2          | Chr2_169026437 | 0.36                   | 0.447                           |
| B+         | SD    | 4          | Chr4_72636153  | 0.30                   | 0.657                           |
| B+         | SD    | 6          | Chr6_2916367   | 0.16                   | 0.114                           |
| B+         | SD    | 7          | Chr7_41779668  | 0.37                   | 0.563                           |
| B+         | PH    | 7          | Chr7_99946782  | 0.15                   | 0.209                           |
| B-         | SD    | 9          | Chr9_45942495  | 0.37                   | 0.203                           |
| B-         | PH    | 1          | Chr1_115455586 | 0.12                   | 0.264                           |
| B-         | PH    | 3          | Chr3_57358057  | 0.31                   | 0.733                           |
| B-         | PH    | 5          | Chr5_4105099   | 0.32                   | 0.143                           |

# Supplementary Figure

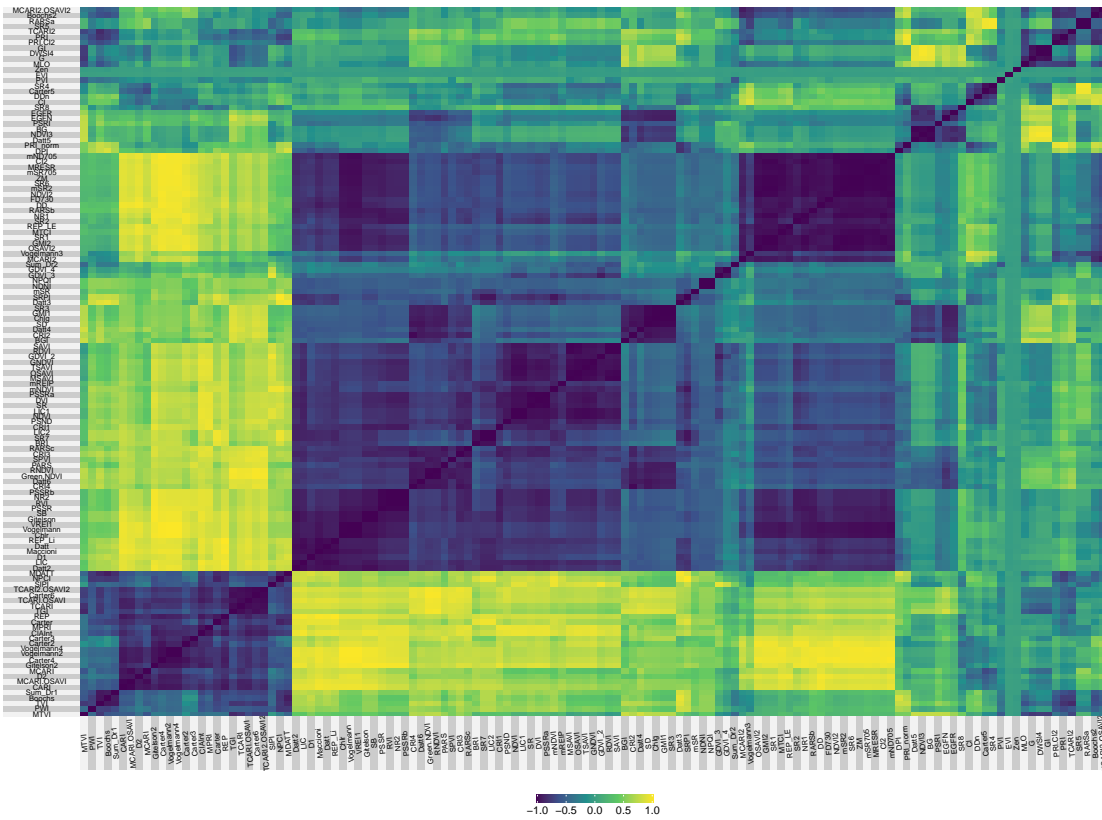

Figure S1: Correlation matrix of 131 hyperspectral indices. The correlation coefficients were computed from the averages of the two managements (B- and B+).

## References

- Ali, A. and Imran, M. (2020). Evaluating the potential of red edge position (REP) of hyperspectral remote sensing data for real time estimation of LAI & chlorophyll content of kinnow mandarin (*Citrus reticulata*) fruit orchards. *Scientia Horticulturae*, 267:109326.
- Apan, A., Held, A., Phinn, S., and Markley, J. (2004). Detecting sugarcane "orange rust" disease using EO-1 Hyperion hyperspectral imagery. *International Journal of Remote Sensing*, 25(2):489–498.
- Baret, F., Guyot, G., and Major, D. (1989). TSAVI: A vegetation index which minimizes soil brightness effects on LAI and APAR estimation. In *12th Canadian Symposium on Remote Sensing Geoscience and Remote Sensing Symposium*,. IEEE.
- Blackburn, G. A. (1998a). Quantifying chlorophylls and carotenoids at leaf and canopy scales. *Remote Sensing of Environment*, 66(3):273–285.
- Blackburn, G. A. (1998b). Quantifying chlorophylls and carotenoids at leaf and canopy scales: An evaluation of some hyperspectral approaches. *Remote Sensing of Environment*, 66(3):273 – 285.
- Boochs, F., Kupfer, G., Dockter, K., and Kühbauch, W. (1990). Shape of the red edge as vitality indicator for plants. *International Journal of Remote Sensing*, 11(10):1741–1753.
- Broge, N. and Leblanc, E. (2001). Comparing prediction power and stability of broadband and hyperspectral vegetation indices for estimation of green leaf area index and canopy chlorophyll density. *Remote Sensing of Environment*, 76(2):156 – 172.
- Carter, G. A. (1994). Ratios of leaf reflectances in narrow wavebands as indicators of plant stress. *International Journal of Remote Sensing*, 15(3):697–703.
- Chappelle, E. W., Kim, M. S., and McMurtrey, J. E. (1992). Ratio analysis of reflectance spectra (rars) - An algorithm for the remote estimation of the concentrations of chlorophyll-a, chlorophyll-b, and carotenoids in soybean leaves. *Remote Sensing of Environment*, 39(3):239–247.
- Chen, J. M. (1996). Evaluation of vegetation indices and a modified simple ratio for boreal applications. *Canadian Journal of Remote Sensing*, 22:229–242.
- Cho, M. A. and Skidmore, A. K. (2006). A new technique for extracting the red edge position from hyperspectral data: The linear extrapolation method. *Remote Sensing of Environment*, 101(2):181 – 193.
- Darvishzadeh, R., Atzberger, C., and Skidmore, A. (2006). Hyperspectral vegetation indices for estimation of leaf area index. In *ISPRS Commission VII Symposium on 'Remote Sensing: From Pixels to Processes*. International Institute for Geo-Information Science and Earth Observation.
- Dash, J. and Curran, P. J. (2004). The MERIS terrestrial chlorophyll index. *International Journal of Remote Sensing*, 25(23):5403–5413.
- Datt, B. (1999). Visible/near infrared reflectance and chlorophyll content in *Eucalyptus* leaves. *International Journal of Remote Sensing*, 20(14):2741–2759.

- Daughtry, C., Walthall, C., Kim, M., de Colstoun, E., and III, J. M. (2000). Estimating corn leaf chlorophyll concentration from leaf and canopy reflectance. *Remote Sensing of Environment*, 74(2):229 – 239.
- Elvidge, C. D. and Chen, Z. K. (1995). Comparison of broad-band and narrow-band red and near-infrared vegetation indexes. *Remote Sensing of Environment*, 54(1):38–48.
- Filella, I. and Peñuelas, J. (1994). The red edge position and shape as indicators of plant chlorophyll content, biomass and hydric status. *International Journal of Remote Sensing*, 15(7):1459–1470.
- Gamon, J., nuelas, J. P., and Field, C. (1992). A narrow-waveband spectral index that tracks diurnal changes in photosynthetic efficiency. *Remote Sensing of Environment*, 41(1):35 – 44.
- Gandia, S., Fernández, G., García, J., and Moreno, J. (2004). Retrieval of vegetation biophysical variables from CHRIS/PROBA data in the SPARC campaign. In *ESA SP*, volume 578, pages 40–48.
- Garrity, S. R., Eitel, J. U., and Vierling, L. A. (2011). Disentangling the relationships between plant pigments and the photochemical reflectance index reveals a new approach for remote estimation of carotenoid content. *Remote Sensing of Environment*, 115(2):628 – 635.
- Gitelson, A., Buschmann, C., and Lichtenthaler, H. (1999). The chlorophyll fluorescence ratio F735/F700 as an accurate measure of the chlorophyll content in plants - Experiments with autumn chestnut and maple leaves. *Remote Sensing of Environment*, 69(3):296–302.
- Gitelson, A. and Merzlyak, M. N. (1994). Quantitative estimation of chlorophyll-a using reflectance spectra: Experiments with autumn chestnut and maple leaves. *Journal of Photochemistry and Photobiology B: Biology*, 22(3):247 – 252.
- Gitelson, A., Y, G., and MN., M. (2003). Relationships between leaf chlorophyll content and spectral reflectance and algorithms for non-destructive chlorophyll assessment in higher plant leaves. *Journal of Plant Physiology*, 160(3):271–282.
- Gitelson, A. A., Kaufman, Y. J., and Merzlyak, M. N. (1996). Use of a green channel in remote sensing of global vegetation from EOS-MODIS. *Remote Sensing of Environment*, 58(3):289 – 298.
- Gitelson, A. A. and Merzlyak, M. N. (1997). Remote estimation of chlorophyll content in higher plant leaves. *International Journal of Remote Sensing*, 18(12):2691–2697.
- Guyot, G. and Baret, F. (1988). Utilisation de la haute resolution spectrale pour suivre l'état des couverts végétaux. In Guyenne, T. D. and Hunt, J. J., editors, *Spectral Signatures of Objects in Remote Sensing*, volume 287 of *ESA Special Publication*, pages 279–286.
- Haboudane, D., Miller, J. R., Tremblay, N., Zarco-Tejada, P. J., and Dextraze, L. (2002). Integrated narrow-band vegetation indices for prediction of crop chlorophyll content for application to precision agriculture. *Remote Sensing of Environment*, 81(2-3):PII S0034-4257(02)00018-4.
- Hernández-Clemente, R., Navarro-Cerrillo, R. M., Suárez, L., Morales, F., and Zarco-Tejada, P. J. (2011). Assessing structural effects on PRI for stress detection in conifer forests. *Remote Sensing of Environment*, 115(9):2360 – 2375.

- Hernández-Clemente, R., Navarro-Cerrillo, R. M., and Zarco-Tejada, P. J. (2012). Carotenoid content estimation in a heterogeneous conifer forest using narrow-band indices and PROSPECT + DART simulations. *Remote Sensing of Environment*, 127(0):298 – 315.
- Huete, A. (1988). A soil-adjusted vegetation index (SAVI). *Remote Sensing of Environment*, 25:295–309.
- Huete, A., Liu, H., Batchily, K., and van Leeuwen, W. (1997). A comparison of vegetation indices over a global set of TM images for EOS-MODIS. *Remote Sensing of Environment*, 59(3):440 – 451.
- Hunt, E. R., Doraiswamy, P. C., McMurtrey, J. E., Daughtry, C. S. T., Perry, E. M., and Akhmedov, B. (2013). A visible band index for remote sensing leaf chlorophyll content at the canopy scale. *International Journal of Applied Earth Observation and Geoinformation*, 21:103–112.
- Jordan, C. F. (1969). Derivation of leaf-area index from quality of light on forest floor. *Ecology*, 50(4):663–&.
- Kim, M., Daughtry, C., Chappelle, E., McMurtrey, J., and Walthall, C. (1994). The use of high spectral resolution bands for estimating absorbed photosynthetically active radiation (Apar). In *Proceedings of the Sixth Symposium on Physical Measurements and Signatures in Remote Sensing*, pages 299–306, Val D’Isere, France.
- Kycko, M., Zagajewski, B., Lavender, S., and Dabija, A. (2019). In situ hyperspectral remote sensing for monitoring of alpine trampled and recultivated species. *Remote Sensing*, 11(11):1296.
- le Maire, G., Francois, C., and Dufrene, E. (2004). Towards universal broad leaf chlorophyll indices using PROSPECT simulated database and hyperspectral reflectance measurements. *Remote Sensing of Environment*, 89(1):1–28.
- le Maire, G., François, C., Soudani, K., Berveiller, D., Pontailier, J.-Y., Bréda, N., Genet, H., Davi, H., and Dufrene, E. (2008). Calibration and validation of hyperspectral indices for the estimation of broadleaved forest leaf chlorophyll content, leaf mass per area, leaf area index and leaf canopy biomass. *Remote Sensing of Environment*, 112(10):3846 – 3864.
- Lichtenthaler, H., Lang, M., Sowinska, M., Heisel, F., and Miehé, J. (1996). Detection of vegetation stress via a new high resolution fluorescence imaging system. *Journal of Plant Physiology*, 148(5):599–612.
- Maccioni, A., Agati, G., and Mazzinghi, P. (2001). New vegetation indices for remote measurement of chlorophylls based on leaf directional reflectance spectra. *Journal of Photochemistry and Photobiology B: Biology*, 61(1-2):52 – 61.
- McMurtrey, J. E., Chappelle, E. W., Kim, M. S., Meisinger, J. J., and Corp, L. A. (1994). Distinguishing nitrogen-fertilization levels in-field corn (*Zea mays* L) with actively induced fluorescence and passive reflectance measurements. *Remote Sensing of Environment*, 47(1):36–44.
- Meiforth, J. J., Buddenbaum, H., Hill, J., and Shepherd, J. (2020). Monitoring of canopy stress symptoms in new zealand kauri trees analysed with AISA hyperspectral data. *Remote Sensing*, 12(6):926.
- Merzlyak, M. N., Gitelson, A. A., Chivkunova, O. B., and Rakitin, V. Y. (1999). Non-destructive optical detection of pigment changes during leaf senescence and fruit ripening. *Physiologia Plantarum*, 106(1):135–141.



- MILLER, J. R., HARE, E. W., and WU, J. (1990). Quantitative characterization of the vegetation red edge reflectance 1. an inverted-gaussian reflectance model. *International Journal of Remote Sensing*, 11(10):1755–1773.
- Montesinos-López, O. A., Montesinos-López, A., Crossa, J., de los Campos, G., Alvarado, G., Suchismita, M., Rutkoski, J., González-Pérez, L., and Burgueño, J. (2017). Predicting grain yield using canopy hyperspectral reflectance in wheat breeding data. *Plant Methods*, 13(1).
- Oppelt, N. and Mauser, W. (2004). Hyperspectral monitoring of physiological parameters of wheat during a vegetation period using AVIS data. *International Journal of Remote Sensing*, 25(1):145–159.
- Peñuelas, J., Baret, F., and Filella, I. (1995). Semiempirical indexes to assess carotenoids chlorophyll-a ratio from leaf spectral reflectance. *Photosynthetica*, 31(2):221–230.
- Peñuelas, J., Gamon, J. A., Fredeen, A. L., Merino, J., and Field, C. B. (1994). Reflectance indexes associated with physiological-changes in nitrogen-limited and water-limited sunflower leaves. *Remote Sensing of Environment*, 48(2):135–146.
- Pearson, R. L. and Miller, L. D. (1972). Remote Mapping of Standing Crop Biomass for Estimation of the Productivity of the Shortgrass Prairie. In *Remote Sensing of Environment, VIII*, page 1355.
- Peng, Y., Fan, M., Wang, Q., Lan, W., and Long, Y. (2018). Best hyperspectral indices for assessing leaf chlorophyll content in a degraded temperate vegetation. *Ecology and Evolution*, 8(14):7068–7078.
- PENUELAS, J., FILELLA, I., LLORET, P., MUNOZ, F., and VILAJELIU, M. (1995). Reflectance assessment of mite effects on apple trees. *International Journal of Remote Sensing*, 16(14):2727–2733.
- Qi, J., Chehbouni, A., Huete, A., Kerr, Y., and Sorooshian, S. (1994). A modified soil adjusted vegetation index. *Remote Sensing of Environment*, 48(2):119 – 126.
- Rondeaux, G., Steven, M., and Baret, F. (1996). Optimization of soil-adjusted vegetation indices. *Remote Sensing of Environment*, 55(2):95–107.
- Roujean, J. L. and Breon, F. M. (1995). Estimating par absorbed by vegetation from bidirectional reflectance measurements. *Remote Sensing of Environment*, 51(3):375–384.
- Sims, D. and Gamon, J. (2002). Relationships between leaf pigment content and spectral reflectance across a wide range of species, leaf structures and developmental stages. *Remote Sensing of Environment*, 81(2):337–354.
- Smith, R., Adams, J., Stephens, D., and Hick, P. (1995). Forecasting wheat yield in a mediterranean-type environment from the NOAA satellite. *Australian Journal of Agricultural Research*, 46(1):113–125.
- Tucker, C. J. (1979). Red and photographic infrared linear combinations for monitoring vegetation. *Remote Sensing of Environment*, 8(2):127–150.
- Velichkova, K. and Krezhova, D. (2019). COMPARATIVE ANALYSIS OF HYPERSPECTRAL VEGETATION INDICES FOR REMOTE ESTIMATION OF LEAF CHLOROPHYLL CONTENT AND PLANT STATUS. *RAD Association Journal*, 3(3).

- Vincini, M., Frazzi, E., and D'Alessio, P. (2006). Angular dependence of maize and sugar beet VIs from directional CHRIS/PROBA data. In *Fourth ESA CHRIS PROBA Workshop. ESRIN*, pages 19–21, Frascati, Italy.
- Vogelmann, J. E., Rock, B. N., and Moss, D. M. (1993). Red edge spectral measurements from sugar maple leaves. *International Journal of Remote Sensing*, 14(8):1563–1575.
- Wang, L. and Wei, Y. (2016). Revised normalized difference nitrogen index (NDNI) for estimating canopy nitrogen concentration in wetlands. *Optik*, 127(19):7676–7688.
- Wu, C., Niu, Z., Tang, Q., and Huang, W. (2008). Estimating chlorophyll content from hyperspectral vegetation indices: Modeling and validation. *Agricultural and Forest Meteorology*, 148(8-9):1230 – 1241.
- Wu, W. (2014). The generalized difference vegetation index (GDVI) for dryland characterization. *Remote Sensing*, 6(2):1211–1233.
- Zarco-Tejada, P. J., Gonzalez-Dugo, V., Williams, L. E., Suarez, L., Berni, J. A. J., Goldhamer, D., and Fereres, E. (2013). A PRI-based water stress index combining structural and chlorophyll effects: Assessment using diurnal narrow-band airborne imagery and the CWSI thermal index. *Remote Sensing of Environment*, 138:38–50.
- Zarco-Tejada, P. J. and Miller, J. R. (1999). Land cover mapping at BOREAS using red edge spectral parameters from CASI imagery. *Journal of Geophysical Research-atmospheres*, 104(D22):27921–27933.
- ZARCOTEJADA, P., BERJON, A., LOPEZLOZANO, R., MILLER, J., MARTIN, P., CACHORRO, V., GONZALEZ, M., and DEFRUTOS, A. (2005). Assessing vineyard condition with hyperspectral indices: Leaf and canopy reflectance simulation in a row-structured discontinuous canopy. *Remote Sensing of Environment*, 99(3):271–287.
- Zhen, Z., Yunsheng, L., Moses, O. A., Rui, L., Li, M., and Jun, L. (2020). Hyperspectral vegetation indexes to monitor wheat plant height under different sowing conditions. *Spectroscopy Letters*, 53(3):194–206.
